# Supplementary material for: High-ambition climate action in all sectors can achieve 65% greenhouse gas emissions reduction in the United States by 2035
Source: Research Square preprint supplement (doi:10.21203/rs.3.rs-3796621/v1), 2024-01-08
Supplement: Supplementary file 1 [file 05b1a064b72340064faa748f.xlsx]

## Sheet: INDEX
Model Outputs Summary
This workbook contains key outputs from the modeled scenarios. Please see below for details.
Sectoral summaries	Description
Net_GHG_Emissions	This sheet contains net economy-wide GHG emissions. Note that historical data is calibrated with EPA inventory through 2020.
Net_GHG_Emissions_Sector	This sheet contains GHG emissions broken down by sector. Note that historical data is calibrated with EPA inventory through 2020.
Electricity_Generation	This sheet contains electricity generation by technology, in units of TWh.
Electricity_Demand	This sheet contains electricity demanded by buildings, industry, and transportation sectors, in units of TWh.
Transport_Service	This sheet contains transportation service by fuel for light duty vehicles and freight trucks, in units of trillion passenger/ton-km.
EV_Sales	This sheet contains electric sales for light duty vehicles and freight trucks, in units of electric share of new sales
Buildings_Final_Energy	This sheet contains commercial and residential buildings final energy by fuel, in units of EJ
Industry_Final_Energy	This sheet contains industrial final energy by fuel, in units of EJ. Cement and other final energy are separate.
Industrial_CCS	This sheet contains industrial carbon capture and sequestration (CCS), in units of MtCO2 sequestered. This includes cement, biofuels, paper pulp, and direct air capture CCS technologies.
EV_Stock_State	This sheet contains electric stock share for light-duty vehicles at the state-level.

## Sheet: Net_GHG_Emissions
Scenario	2005	2010	2015	2020	2025	2030	2035	Units
Current Policies - High	6696.6	6306.9	6064.9	5252	4534.98	3663.24	3244.18	MtCO2e
Current Policies - Low	6696.6	6306.9	6064.9	5252	4930.83	4370.51	4219.16	MtCO2e
Current Policies	6696.6	6306.9	6064.9	5252	4772.19	4036.22	3727.82	MtCO2e
Enhanced Ambition - High	6696.6	6306.9	6064.9	5252	4232.01	2844.21	1971.96	MtCO2e
Enhanced Ambition - Low	6696.6	6306.9	6064.9	5252	4600.62	3480.98	2743.86	MtCO2e
Enhanced Ambition	6696.6	6306.9	6064.9	5252	4399	3150	2339	MtCO2e

## Sheet: Net_GHG_Emissions_Sector
Scenario	Sector	Subsector	2005	2010	2015	2020	2025	2030	2035	Units
Enhanced Ambition	Buildings	Buildings CO2	586	559.3	561.9	541.7	501.498	444.644	335.155	MtCO2e
Enhanced Ambition	Electricity	Electricity CO2	2417.1	2276.7	1920.9	1456.7	1033.81	352.09	86.4291	MtCO2e
Enhanced Ambition	Industry	Industry CO2	1193.2	1091.5	1126.4	1106.2	1042.54	1009.72	974.123	MtCO2e
Enhanced Ambition	Transportation	Transportation CO2	1868.8	1707	1729.2	1580.5	1414.87	1108.41	814.81	MtCO2e
Enhanced Ambition	Other	Other CO2	67.4	44.9	37.6	31.5	31.2177	25.426	20.8863	MtCO2e
Enhanced Ambition	Methane	CH4	852.3	860.5	837.9	807.4	695.821	585.062	570.357	MtCO2e
Enhanced Ambition	Other	F-gases	138.4	159	170.3	180.3	157.573	123.718	92.2799	MtCO2e
Enhanced Ambition	Other	N2O	426.9	415.4	432.9	400	409.45	407.034	401.872	MtCO2e
Enhanced Ambition	Other	LULUCF CO2	-853.5	-807.4	-752.2	-852.5	-857	-881	-926	MtCO2e
Enhanced Ambition	Other	Direct Air Capture	0	0	0	0	0	0	-30.6843	MtCO2e
Enhanced Ambition	Net total	Net total	6696.6	6306.9	6064.9	5251.8	4429.77	3175.1	2339.23	MtCO2e
Current Policies	Buildings	Buildings CO2	586	559.3	561.9	541.7	504.686	476.218	456.345	MtCO2e
Current Policies	Electricity	Electricity CO2	2417.1	2276.7	1920.9	1456.7	1087.65	671.199	629.249	MtCO2e
Current Policies	Industry	Industry CO2	1193.2	1091.5	1126.4	1106.2	1126.31	1164.65	1149.28	MtCO2e
Current Policies	Transportation	Transportation CO2	1868.8	1707	1729.2	1580.5	1502.93	1267.03	1061.24	MtCO2e
Current Policies	Other	Other CO2	67.4	44.9	37.6	31.5	32.6561	29.4073	27.7993	MtCO2e
Current Policies	Methane	CH4	852.3	860.5	837.9	807.4	787.1	745.037	766.142	MtCO2e
Current Policies	Other	F-gases	138.4	159	170.3	180.3	159.448	129.58	110.516	MtCO2e
Current Policies	Other	N2O	426.9	415.4	432.9	400	413.416	411.102	409.241	MtCO2e
Current Policies	Other	LULUCF CO2	-853.5	-807.4	-752.2	-852.5	-842	-858	-882	MtCO2e
Current Policies	Net total	Net total	6696.6	6306.9	6064.9	5251.8	4720.79	3991.68	3641.09	MtCO2e

## Sheet: Electricity_Generation
Variable	Sector	Scenario	2015	2020	2025	2030	2035	Unit
Electricity Generation	Biomass w/ ccs	Current Policies	0	0	0	2.37731	4.54728	TWh
Electricity Generation	Biomass w/ ccs	Current Policies - Low	0	0	0	2.41587	4.52357	TWh
Electricity Generation	Biomass w/ ccs	Current Policies - High	0	0	0	2.66818	5.17328	TWh
Electricity Generation	Biomass w/ ccs	Enhanced Ambition	0	0	0.708469	31.6309	42.035	TWh
Electricity Generation	Biomass w/ ccs	Enhanced Ambition - Low	0	0	2.64139	54.8031	69.5576	TWh
Electricity Generation	Biomass w/ ccs	Enhanced Ambition - High	0	0	0.0740374	9.30333	18.4943	TWh
Electricity Generation	Biomass w/o ccs	Current Policies	34.6066	9.32381	13.0458	15.2541	17.4701	TWh
Electricity Generation	Biomass w/o ccs	Current Policies - Low	34.6066	9.30216	12.9432	14.9725	16.8416	TWh
Electricity Generation	Biomass w/o ccs	Current Policies - High	34.6066	9.3024	13.8413	16.7617	19.7195	TWh
Electricity Generation	Biomass w/o ccs	Enhanced Ambition	34.6066	9.3181	15.4752	21.1052	25.1808	TWh
Electricity Generation	Biomass w/o ccs	Enhanced Ambition - Low	34.6066	9.29695	15.9967	21.244	25.6237	TWh
Electricity Generation	Biomass w/o ccs	Enhanced Ambition - High	34.6066	9.29685	15.7326	21.6888	25.587	TWh
Electricity Generation	Coal w/ ccs	Current Policies	0	0	0	69.2292	69.0928	TWh
Electricity Generation	Coal w/ ccs	Current Policies - Low	0	0	0	68.0317	67.8918	TWh
Electricity Generation	Coal w/ ccs	Current Policies - High	0	0	0	78.4996	78.3671	TWh
Electricity Generation	Coal w/ ccs	Enhanced Ambition	0	0	0.828489	117.999	114.189	TWh
Electricity Generation	Coal w/ ccs	Enhanced Ambition - Low	0	0	0.762431	115.8	112	TWh
Electricity Generation	Coal w/ ccs	Enhanced Ambition - High	0	0	0.158442	131.327	127.456	TWh
Electricity Generation	Coal w/o ccs	Current Policies	1455.08	740.495	497.222	219.444	219.444	TWh
Electricity Generation	Coal w/o ccs	Current Policies - Low	1455.08	740.486	497.222	219.444	219.444	TWh
Electricity Generation	Coal w/o ccs	Current Policies - High	1455.08	740.486	497.222	219.444	219.444	TWh
Electricity Generation	Coal w/o ccs	Enhanced Ambition	1455.08	740.494	466.667	0.277777	3.44816e-07	TWh
Electricity Generation	Coal w/o ccs	Enhanced Ambition - Low	1455.08	740.485	466.667	0.277777	2.43506e-07	TWh
Electricity Generation	Coal w/o ccs	Enhanced Ambition - High	1455.08	740.485	466.662	0.27777	3.28531e-08	TWh
Electricity Generation	Gas w/ ccs	Current Policies	0	0	0	388.779	432.172	TWh
Electricity Generation	Gas w/ ccs	Current Policies - Low	0	0	0	352.946	411.159	TWh
Electricity Generation	Gas w/ ccs	Current Policies - High	0	0	0	419.718	434.043	TWh
Electricity Generation	Gas w/ ccs	Enhanced Ambition	0	0	0.333625	482.845	1067.03	TWh
Electricity Generation	Gas w/ ccs	Enhanced Ambition - Low	0	0	0.353208	466.75	1094.02	TWh
Electricity Generation	Gas w/ ccs	Enhanced Ambition - High	0	0	0.0442975	481.689	996.556	TWh
Electricity Generation	Gas w/o ccs	Current Policies	1289.36	1646.88	1526.96	1064.46	933.861	TWh
Electricity Generation	Gas w/o ccs	Current Policies - Low	1289.36	1648.23	1560.74	1148.37	1017.39	TWh
Electricity Generation	Gas w/o ccs	Current Policies - High	1289.36	1648.23	1451.07	921.176	777.193	TWh
Electricity Generation	Gas w/o ccs	Enhanced Ambition	1289.36	1647.5	1474.42	853.292	57.2241	TWh
Electricity Generation	Gas w/o ccs	Enhanced Ambition - Low	1289.36	1648.83	1490.88	897.132	57.4541	TWh
Electricity Generation	Gas w/o ccs	Enhanced Ambition - High	1289.36	1648.83	1425.07	784.42	55.9613	TWh
Electricity Generation	Geothermal	Current Policies	18.727	18.0866	18.727	18.582	18.5599	TWh
Electricity Generation	Geothermal	Current Policies - Low	18.727	18.124	18.727	18.6981	18.727	TWh
Electricity Generation	Geothermal	Current Policies - High	18.727	18.124	18.727	18.5871	18.5664	TWh
Electricity Generation	Geothermal	Enhanced Ambition	18.727	18.0896	18.727	18.7216	18.727	TWh
Electricity Generation	Geothermal	Enhanced Ambition - Low	18.727	18.1269	18.727	18.727	18.727	TWh
Electricity Generation	Geothermal	Enhanced Ambition - High	18.727	18.1269	18.727	18.6134	18.6232	TWh
Electricity Generation	Hydro	Current Policies	251.018	292.365	292.663	292.305	292.342	TWh
Electricity Generation	Hydro	Current Policies - Low	251.018	292.409	292.663	292.337	292.388	TWh
Electricity Generation	Hydro	Current Policies - High	251.018	292.409	292.663	292.306	292.344	TWh
Electricity Generation	Hydro	Enhanced Ambition	251.018	292.368	292.663	292.343	292.388	TWh
Electricity Generation	Hydro	Enhanced Ambition - Low	251.018	292.412	292.663	292.344	292.388	TWh
Electricity Generation	Hydro	Enhanced Ambition - High	251.018	292.412	292.663	292.313	292.359	TWh
Electricity Generation	Nuclear	Current Policies	830.288	791.647	783.011	783.011	783.011	TWh
Electricity Generation	Nuclear	Current Policies - Low	830.288	791.696	783.011	783.011	783.011	TWh
Electricity Generation	Nuclear	Current Policies - High	830.288	791.696	783.011	783.011	783.011	TWh
Electricity Generation	Nuclear	Enhanced Ambition	830.288	791.651	783.011	783.011	783.011	TWh
Electricity Generation	Nuclear	Enhanced Ambition - Low	830.288	791.699	783.011	783.011	783.011	TWh
Electricity Generation	Nuclear	Enhanced Ambition - High	830.288	791.699	783.011	783.011	783.011	TWh
Electricity Generation	Other	Current Policies	30.2108	11.8541	10.2995	6.07579	4.67626	TWh
Electricity Generation	Other	Current Policies - Low	30.2108	11.8703	14.7837	13.1453	9.92288	TWh
Electricity Generation	Other	Current Policies - High	30.2108	11.8703	6.00424	2.79801	2.78738	TWh
Electricity Generation	Other	Enhanced Ambition	30.2108	11.9286	10.8408	11.173	6.55174	TWh
Electricity Generation	Other	Enhanced Ambition - Low	30.2108	11.9467	16.6067	14.4243	8.67003	TWh
Electricity Generation	Other	Enhanced Ambition - High	30.2108	11.9467	6.37667	5.23313	4.43992	TWh
Electricity Generation	Solar	Current Policies	35.6335	178.303	539.412	867.789	1147.79	TWh
Electricity Generation	Solar	Current Policies - Low	35.6335	176.734	541.149	871.158	1158.46	TWh
Electricity Generation	Solar	Current Policies - High	35.6335	176.734	555.264	883.101	1152.63	TWh
Electricity Generation	Solar	Enhanced Ambition	35.6335	178.425	568.711	976.826	1433.62	TWh
Electricity Generation	Solar	Enhanced Ambition - Low	35.6335	176.854	578.844	989.954	1470.66	TWh
Electricity Generation	Solar	Enhanced Ambition - High	35.6335	176.854	571.254	975.898	1403.19	TWh
Electricity Generation	Wind	Current Policies	192.982	348.267	923.145	1367.49	1692.75	TWh
Electricity Generation	Wind	Current Policies - Low	192.982	348.926	924.538	1374.96	1706.23	TWh
Electricity Generation	Wind	Current Policies - High	192.982	348.925	956.004	1407.55	1753.39	TWh
Electricity Generation	Wind	Enhanced Ambition	192.982	348.387	993.367	1438.75	1939.97	TWh
Electricity Generation	Wind	Enhanced Ambition - Low	192.982	349.046	1001.88	1455.85	1991.7	TWh
Electricity Generation	Wind	Enhanced Ambition - High	192.982	349.046	1003.54	1452.81	1933.12	TWh

## Sheet: Electricity_Demand
Variable	Sector	Scenario	2015	2020	2025	2030	2035	Unit
Electricity Demand	Buildings	Current Policies	2865.6	2864.43	3037.96	3082.07	3077.26	TWh
Electricity Demand	Buildings	Current Policies - Low	2865.6	2864.64	3032.21	3072.15	3060.35	TWh
Electricity Demand	Buildings	Current Policies - High	2865.6	2864.64	3047.52	3095.09	3099.78	TWh
Electricity Demand	Buildings	Enhanced Ambition	2865.6	2864.77	3033.88	3035.29	3013.08	TWh
Electricity Demand	Buildings	Enhanced Ambition - Low	2865.6	2864.98	3028.45	3035.61	3016	TWh
Electricity Demand	Buildings	Enhanced Ambition - High	2865.6	2864.98	3040.75	3043.74	3012.35	TWh
Electricity Demand	Industry	Current Policies	948.995	823.694	1077.94	1243.41	1501.32	TWh
Electricity Demand	Industry	Current Policies - Low	948.995	823.725	1125.32	1321.82	1606.97	TWh
Electricity Demand	Industry	Current Policies - High	948.995	823.725	1030.28	1163.66	1394.39	TWh
Electricity Demand	Industry	Enhanced Ambition	948.995	822.945	1066.18	1215.1	1544.97	TWh
Electricity Demand	Industry	Enhanced Ambition - Low	948.995	822.974	1117.25	1291.28	1663.2	TWh
Electricity Demand	Industry	Enhanced Ambition - High	948.995	822.974	1010.43	1128.27	1437.34	TWh
Electricity Demand	Transportation	Current Policies	8.68561	49.7964	132.84	366.605	575.387	TWh
Electricity Demand	Transportation	Current Policies - Low	8.68561	49.8027	129.86	358.601	573.055	TWh
Electricity Demand	Transportation	Current Policies - High	8.68561	49.8027	139.382	384.161	582.813	TWh
Electricity Demand	Transportation	Enhanced Ambition	8.68561	51.0797	169.123	380.693	743.362	TWh
Electricity Demand	Transportation	Enhanced Ambition - Low	8.68561	51.0857	165.099	380.998	758.267	TWh
Electricity Demand	Transportation	Enhanced Ambition - High	8.68561	51.0857	174.647	391.207	737.825	TWh

## Sheet: Transport_Service
Variable	Sector	Tech	Scenario	2015	2020	2025	2030	2035	Variable	Unit
Total Transport Service	Freight	Electric	Current Policies	0	0.0013479	0.0450039	0.119018	0.235609	Total Transport Service	trillion ton-km/passenger-km
Total Transport Service	Freight	Electric	Current Policies - Low	0	0.00134802	0.0433233	0.114045	0.226577	Total Transport Service	trillion ton-km/passenger-km
Total Transport Service	Freight	Electric	Current Policies - High	0	0.00134802	0.0481957	0.130358	0.250147	Total Transport Service	trillion ton-km/passenger-km
Total Transport Service	Freight	Electric	Enhanced Ambition	0	0.00134726	0.0484589	0.158998	0.487363	Total Transport Service	trillion ton-km/passenger-km
Total Transport Service	Freight	Electric	Enhanced Ambition - Low	0	0.00134738	0.0465329	0.156459	0.487023	Total Transport Service	trillion ton-km/passenger-km
Total Transport Service	Freight	Electric	Enhanced Ambition - High	0	0.00134738	0.0505903	0.167552	0.49509	Total Transport Service	trillion ton-km/passenger-km
Total Transport Service	Freight	Gasoline/Diesel	Current Policies	1.35165	1.23252	1.4057	1.38702	1.40202	Total Transport Service	trillion ton-km/passenger-km
Total Transport Service	Freight	Gasoline/Diesel	Current Policies - Low	1.35165	1.23234	1.51354	1.57035	1.68823	Total Transport Service	trillion ton-km/passenger-km
Total Transport Service	Freight	Gasoline/Diesel	Current Policies - High	1.35165	1.23233	1.25727	1.19279	1.15749	Total Transport Service	trillion ton-km/passenger-km
Total Transport Service	Freight	Gasoline/Diesel	Enhanced Ambition	1.35165	1.23412	1.40562	1.42299	1.24139	Total Transport Service	trillion ton-km/passenger-km
Total Transport Service	Freight	Gasoline/Diesel	Enhanced Ambition - Low	1.35165	1.23396	1.52764	1.57884	1.49517	Total Transport Service	trillion ton-km/passenger-km
Total Transport Service	Freight	Gasoline/Diesel	Enhanced Ambition - High	1.35165	1.23396	1.26404	1.21432	1.01222	Total Transport Service	trillion ton-km/passenger-km
Total Transport Service	Passenger	Electric	Current Policies	0	0.00632532	0.338511	1.65683	2.80105	Total Transport Service	trillion ton-km/passenger-km
Total Transport Service	Passenger	Electric	Current Policies - Low	0	0.00632627	0.325479	1.60571	2.79026	Total Transport Service	trillion ton-km/passenger-km
Total Transport Service	Passenger	Electric	Current Policies - High	0	0.00632627	0.367556	1.75279	2.83136	Total Transport Service	trillion ton-km/passenger-km
Total Transport Service	Passenger	Electric	Enhanced Ambition	0	0.0143792	0.55888	1.64234	3.37593	Total Transport Service	trillion ton-km/passenger-km
Total Transport Service	Passenger	Electric	Enhanced Ambition - Low	0	0.0143825	0.541896	1.63658	3.45045	Total Transport Service	trillion ton-km/passenger-km
Total Transport Service	Passenger	Electric	Enhanced Ambition - High	0	0.0143825	0.585808	1.69476	3.33894	Total Transport Service	trillion ton-km/passenger-km
Total Transport Service	Passenger	Gasoline/Diesel	Current Policies	8.3182	7.45554	8.30936	7.66939	6.74948	Total Transport Service	trillion ton-km/passenger-km
Total Transport Service	Passenger	Gasoline/Diesel	Current Policies - Low	8.3182	7.45538	8.50859	8.04387	7.25892	Total Transport Service	trillion ton-km/passenger-km
Total Transport Service	Passenger	Gasoline/Diesel	Current Policies - High	8.3182	7.45538	8.0271	7.2103	6.1916	Total Transport Service	trillion ton-km/passenger-km
Total Transport Service	Passenger	Gasoline/Diesel	Enhanced Ambition	8.3182	7.44888	8.0892	6.61725	4.72409	Total Transport Service	trillion ton-km/passenger-km
Total Transport Service	Passenger	Gasoline/Diesel	Enhanced Ambition - Low	8.3182	7.44874	8.30073	6.89883	5.03313	Total Transport Service	trillion ton-km/passenger-km
Total Transport Service	Passenger	Gasoline/Diesel	Enhanced Ambition - High	8.3182	7.44874	7.81822	6.23447	4.34882	Total Transport Service	trillion ton-km/passenger-km

## Sheet: EV_Sales
Variable	Scenario	Sector	2025	2030	2035	Unit
EV Sales	Current Policies	Freight	7.4604	14.9523	17.6477	Electric Share of New Sales
EV Sales	Current Policies	Passenger	9.97324	36.926	45.4009	Electric Share of New Sales
EV Sales	Current Policies - Low	Freight	6.08054	12.1674	14.4557	Electric Share of New Sales
EV Sales	Current Policies - Low	Passenger	9.07766	34.2433	43.0487	Electric Share of New Sales
EV Sales	Current Policies - High	Freight	10.6101	19.0778	20.8707	Electric Share of New Sales
EV Sales	Current Policies - High	Passenger	11.7297	40.6151	47.6231	Electric Share of New Sales
EV Sales	Enhanced Ambition	Freight	8.01581	19.0153	41.9774	Electric Share of New Sales
EV Sales	Enhanced Ambition	Passenger	14.1763	45.9934	83.4633	Electric Share of New Sales
EV Sales	Enhanced Ambition - Low	Freight	6.39327	17.0991	36.2237	Electric Share of New Sales
EV Sales	Enhanced Ambition - Low	Passenger	13.0772	44.2317	81.0534	Electric Share of New Sales
EV Sales	Enhanced Ambition - High	Freight	10.9516	23.6951	46.3168	Electric Share of New Sales
EV Sales	Enhanced Ambition - High	Passenger	15.8764	49.7913	85.7913	Electric Share of New Sales

## Sheet: Buildings_Final_Energy
Variable	Scenario	Fuel	2015	2020	2025	2030	2035	Unit
Building Final Energy	Current Policies	biomass	0.522664	0.484814	0.46125	0.423188	0.412148	EJ
Building Final Energy	Current Policies	coal	0.02813	0.0217132	0.0182234	0.014065	0.00990663	EJ
Building Final Energy	Current Policies	electricity	10.3161	10.3118	10.9366	11.0954	11.0781	EJ
Building Final Energy	Current Policies	gas	7.61722	7.07549	6.7869	6.37477	6.13171	EJ
Building Final Energy	Current Policies	refined liquids	1.16178	1.14981	1.14434	1.09252	1.01447	EJ
Building Final Energy	Current Policies - Low	biomass	0.522664	0.484708	0.459471	0.417163	0.397867	EJ
Building Final Energy	Current Policies - Low	coal	0.02813	0.0217132	0.0182234	0.014065	0.00990663	EJ
Building Final Energy	Current Policies - Low	electricity	10.3161	10.3126	10.9159	11.0596	11.0172	EJ
Building Final Energy	Current Policies - Low	gas	7.61722	7.07499	6.80806	6.43116	6.24172	EJ
Building Final Energy	Current Policies - Low	refined liquids	1.16178	1.14955	1.21793	1.21451	1.1801	EJ
Building Final Energy	Current Policies - High	biomass	0.522664	0.484706	0.463219	0.431248	0.433402	EJ
Building Final Energy	Current Policies - High	coal	0.02813	0.0217132	0.0182234	0.014065	0.00990663	EJ
Building Final Energy	Current Policies - High	electricity	10.3161	10.3126	10.971	11.1422	11.1591	EJ
Building Final Energy	Current Policies - High	gas	7.61722	7.07499	6.73145	6.21315	5.77008	EJ
Building Final Energy	Current Policies - High	refined liquids	1.16178	1.14955	1.05287	0.976812	0.903015	EJ
Building Final Energy	Enhanced Ambition	biomass	0.522664	0.484502	0.461044	0.434187	0.36202	EJ
Building Final Energy	Enhanced Ambition	coal	0.02813	0.0217132	0.0182234	0.014065	0.00990663	EJ
Building Final Energy	Enhanced Ambition	electricity	10.3161	10.3131	10.9219	10.927	10.847	EJ
Building Final Energy	Enhanced Ambition	gas	7.61722	7.07203	6.74991	5.87332	4.3581	EJ
Building Final Energy	Enhanced Ambition	refined liquids	1.16178	1.15114	1.14367	1.08362	0.834609	EJ
Building Final Energy	Enhanced Ambition - Low	biomass	0.522664	0.484399	0.45972	0.431069	0.358633	EJ
Building Final Energy	Enhanced Ambition - Low	coal	0.02813	0.0217132	0.0182234	0.014065	0.00990663	EJ
Building Final Energy	Enhanced Ambition - Low	electricity	10.3161	10.3138	10.9023	10.9281	10.8575	EJ
Building Final Energy	Enhanced Ambition - Low	gas	7.61722	7.07153	6.74578	5.90438	4.40139	EJ
Building Final Energy	Enhanced Ambition - Low	refined liquids	1.16178	1.1509	1.23588	1.17663	0.929091	EJ
Building Final Energy	Enhanced Ambition - High	biomass	0.522664	0.484399	0.461901	0.437787	0.366723	EJ
Building Final Energy	Enhanced Ambition - High	coal	0.02813	0.0217132	0.0182234	0.014065	0.00990663	EJ
Building Final Energy	Enhanced Ambition - High	electricity	10.3161	10.3138	10.9466	10.9574	10.8444	EJ
Building Final Energy	Enhanced Ambition - High	gas	7.61722	7.07153	6.71195	5.76315	4.1972	EJ
Building Final Energy	Enhanced Ambition - High	refined liquids	1.16178	1.1509	1.05739	0.958024	0.750491	EJ

## Sheet: Industry_Final_Energy
Variable	Fuel	Scenario	2015	2020	2025	2030	2035	Unit
Cement Final Energy	Biomass	Current Policies	0.0029811	0.00305001	0.00348379	0.00400695	0.00443495	EJ
Cement Final Energy	Biomass	Current Policies - Low	0.0029811	0.00304986	0.00339621	0.00371745	0.00384881	EJ
Cement Final Energy	Biomass	Current Policies - High	0.0029811	0.00304986	0.00400923	0.00470008	0.00492141	EJ
Cement Final Energy	Biomass	Enhanced Ambition	0.0029811	0.00312914	0.00338625	0.00504121	0.00881564	EJ
Cement Final Energy	Biomass	Enhanced Ambition - Low	0.0029811	0.00312884	0.00359539	0.00487755	0.00723751	EJ
Cement Final Energy	Biomass	Enhanced Ambition - High	0.0029811	0.00312884	0.00307451	0.00513383	0.0109202	EJ
Cement Final Energy	Coal	Current Policies	0.196802	0.20146	0.226009	0.253274	0.275215	EJ
Cement Final Energy	Coal	Current Policies - Low	0.196802	0.201463	0.220726	0.236179	0.240419	EJ
Cement Final Energy	Coal	Current Policies - High	0.196802	0.201463	0.258631	0.29695	0.306779	EJ
Cement Final Energy	Coal	Enhanced Ambition	0.196802	0.201291	0.192626	0.16932	0.10844	EJ
Cement Final Energy	Coal	Enhanced Ambition - Low	0.196802	0.201292	0.193023	0.169115	0.107753	EJ
Cement Final Energy	Coal	Enhanced Ambition - High	0.196802	0.201292	0.181604	0.170291	0.10921	EJ
Cement Final Energy	Electricity	Current Policies	0.0380417	0.0382949	0.0438714	0.0488305	0.053337	EJ
Cement Final Energy	Electricity	Current Policies - Low	0.0380417	0.0382934	0.0453756	0.0523788	0.0593218	EJ
Cement Final Energy	Electricity	Current Policies - High	0.0380417	0.0382935	0.0428659	0.0459525	0.048155	EJ
Cement Final Energy	Electricity	Enhanced Ambition	0.0380417	0.0382958	0.0384086	0.0430241	0.0460636	EJ
Cement Final Energy	Electricity	Enhanced Ambition - Low	0.0380417	0.0382943	0.0416905	0.0481838	0.053711	EJ
Cement Final Energy	Electricity	Enhanced Ambition - High	0.0380417	0.0382943	0.0351513	0.036929	0.0393681	EJ
Cement Final Energy	Gas	Current Policies	0.00894329	0.00915635	0.00991147	0.0106981	0.0109642	EJ
Cement Final Energy	Gas	Current Policies - Low	0.00894329	0.00915648	0.0099138	0.0108725	0.0115167	EJ
Cement Final Energy	Gas	Current Policies - High	0.00894329	0.00915649	0.010353	0.0104613	0.00885009	EJ
Cement Final Energy	Gas	Enhanced Ambition	0.00894329	0.00914866	0.00901661	0.0110884	0.0159853	EJ
Cement Final Energy	Gas	Enhanced Ambition - Low	0.00894329	0.0091487	0.0095523	0.0115685	0.0151886	EJ
Cement Final Energy	Gas	Enhanced Ambition - High	0.00894329	0.0091487	0.00821879	0.0095279	0.0134127	EJ
Cement Final Energy	Oil	Current Policies	0.0857188	0.0827765	0.0996718	0.107243	0.113712	EJ
Cement Final Energy	Oil	Current Policies - Low	0.0857188	0.0827618	0.116576	0.151471	0.193741	EJ
Cement Final Energy	Oil	Current Policies - High	0.0857188	0.0827617	0.0583496	0.0412256	0.0450139	EJ
Cement Final Energy	Oil	Enhanced Ambition	0.0857188	0.0828811	0.0916744	0.144008	0.212251	EJ
Cement Final Energy	Oil	Enhanced Ambition - Low	0.0857188	0.0828681	0.115875	0.183492	0.27285	EJ
Cement Final Energy	Oil	Enhanced Ambition - High	0.0857188	0.0828681	0.0786507	0.0978571	0.160997	EJ
Other Industry Final Energy (No Feedstocks)	Biomass	Current Policies	1.46362	1.47854	1.56505	1.711	1.90055	EJ
Other Industry Final Energy (No Feedstocks)	Biomass	Current Policies - Low	1.46362	1.47844	1.59075	1.76701	1.98155	EJ
Other Industry Final Energy (No Feedstocks)	Biomass	Current Policies - High	1.46362	1.47843	1.53904	1.65835	1.82451	EJ
Other Industry Final Energy (No Feedstocks)	Biomass	Enhanced Ambition	1.46362	1.47851	1.64771	1.88725	2.05113	EJ
Other Industry Final Energy (No Feedstocks)	Biomass	Enhanced Ambition - Low	1.46362	1.4784	1.67715	1.94866	2.14186	EJ
Other Industry Final Energy (No Feedstocks)	Biomass	Enhanced Ambition - High	1.46362	1.4784	1.61603	1.81408	1.95978	EJ
Other Industry Final Energy (No Feedstocks)	Coal	Current Policies	1.08659	1.08468	1.10116	1.06372	0.867804	EJ
Other Industry Final Energy (No Feedstocks)	Coal	Current Policies - Low	1.08659	1.08465	1.11722	1.10021	0.920569	EJ
Other Industry Final Energy (No Feedstocks)	Coal	Current Policies - High	1.08659	1.08465	1.08611	1.03312	0.826169	EJ
Other Industry Final Energy (No Feedstocks)	Coal	Enhanced Ambition	1.08659	1.08435	1.04897	0.90126	0.554584	EJ
Other Industry Final Energy (No Feedstocks)	Coal	Enhanced Ambition - Low	1.08659	1.08431	1.04847	0.900953	0.554393	EJ
Other Industry Final Energy (No Feedstocks)	Coal	Enhanced Ambition - High	1.08659	1.08431	1.04634	0.901753	0.55479	EJ
Other Industry Final Energy (No Feedstocks)	Electricity	Current Policies	3.17431	2.74157	3.64449	4.23887	5.16137	EJ
Other Industry Final Energy (No Feedstocks)	Electricity	Current Policies - Low	3.17431	2.7417	3.80458	4.50238	5.51284	EJ
Other Industry Final Energy (No Feedstocks)	Electricity	Current Policies - High	3.17431	2.7417	3.48626	3.96929	4.79752	EJ
Other Industry Final Energy (No Feedstocks)	Electricity	Enhanced Ambition	3.17431	2.74188	3.61592	4.15797	5.35169	EJ
Other Industry Final Energy (No Feedstocks)	Electricity	Enhanced Ambition - Low	3.17431	2.742	3.78644	4.41655	5.74925	EJ
Other Industry Final Energy (No Feedstocks)	Electricity	Enhanced Ambition - High	3.17431	2.742	3.42923	3.8661	4.98368	EJ
Other Industry Final Energy (No Feedstocks)	Gas	Current Policies	7.31035	7.37511	7.728	8.16347	8.20644	EJ
Other Industry Final Energy (No Feedstocks)	Gas	Current Policies - Low	7.31035	7.37483	7.86549	8.53249	8.82188	EJ
Other Industry Final Energy (No Feedstocks)	Gas	Current Policies - High	7.31035	7.37484	7.60404	7.78548	7.43969	EJ
Other Industry Final Energy (No Feedstocks)	Gas	Enhanced Ambition	7.31035	7.37406	7.68432	8.14342	8.29655	EJ
Other Industry Final Energy (No Feedstocks)	Gas	Enhanced Ambition - Low	7.31035	7.37379	7.81911	8.50915	8.88823	EJ
Other Industry Final Energy (No Feedstocks)	Gas	Enhanced Ambition - High	7.31035	7.37379	7.55921	7.71989	7.52188	EJ
Other Industry Final Energy (No Feedstocks)	Oil	Current Policies	1.57029	1.49114	1.62295	1.72025	1.77309	EJ
Other Industry Final Energy (No Feedstocks)	Oil	Current Policies - Low	1.57029	1.49084	1.83285	2.20168	2.54387	EJ
Other Industry Final Energy (No Feedstocks)	Oil	Current Policies - High	1.57029	1.49084	1.25055	1.19898	1.27986	EJ
Other Industry Final Energy (No Feedstocks)	Oil	Enhanced Ambition	1.57029	1.49358	1.61941	1.91446	1.93081	EJ
Other Industry Final Energy (No Feedstocks)	Oil	Enhanced Ambition - Low	1.57029	1.49332	1.86285	2.34179	2.63012	EJ
Other Industry Final Energy (No Feedstocks)	Oil	Enhanced Ambition - High	1.57029	1.49332	1.29726	1.38226	1.41869	EJ

## Sheet: Industrial_CCS
Variable	Sector	Scenario	2025	2030	2035	Unit
Industrial CCS	Biofuels CCS	Current Policies - Low	0	0	0.284332	MtCO2 sequestered
Industrial CCS	Biofuels CCS	Enhanced Ambition	26.9542	59.4899	46.1568	MtCO2 sequestered
Industrial CCS	Biofuels CCS	Enhanced Ambition - Low	28.7193	51.6726	47.1651	MtCO2 sequestered
Industrial CCS	Biofuels CCS	Enhanced Ambition - High	26.5696	69.4347	69.5934	MtCO2 sequestered
Industrial CCS	Cement CCS	Current Policies	0	1.41205	4.63092	MtCO2 sequestered
Industrial CCS	Cement CCS	Current Policies - Low	0	1.70388	5.41742	MtCO2 sequestered
Industrial CCS	Cement CCS	Current Policies - High	0	1.13169	3.87444	MtCO2 sequestered
Industrial CCS	Cement CCS	Enhanced Ambition	6.51541	12.647	17.9993	MtCO2 sequestered
Industrial CCS	Cement CCS	Enhanced Ambition - Low	7.07559	14.1647	17.9993	MtCO2 sequestered
Industrial CCS	Cement CCS	Enhanced Ambition - High	5.9574	10.8491	16.5778	MtCO2 sequestered
Industrial CCS	Direct Air Capture	Enhanced Ambition	0	0	31	MtCO2 sequestered
Industrial CCS	Direct Air Capture	Enhanced Ambition - Low	0	0	36	MtCO2 sequestered
Industrial CCS	Direct Air Capture	Enhanced Ambition - High	0	0	22	MtCO2 sequestered
Industrial CCS	Paper Pulp CCS	Enhanced Ambition	6.66881	13.2837	13.2932	MtCO2 sequestered
Industrial CCS	Paper Pulp CCS	Enhanced Ambition - Low	6.66957	13.2837	13.2932	MtCO2 sequestered
Industrial CCS	Paper Pulp CCS	Enhanced Ambition - High	6.66164	13.2837	13.2932	MtCO2 sequestered

[truncated: 1 more sheets: EV_Stock_State]
