# Supplementary material for: High-ambition climate action in all sectors can achieve 65% greenhouse gas emissions reduction in the United States by 2035
Source: Research Square preprint supplement (doi:10.21203/rs.3.rs-3796621/v1), 2024-01-08
Supplement: Supplementary file 2 [file 975e304c0f081986cc0c59a4.xlsx]

## Sheet: INDEX
State-Level Inputs Summary
This workbook contains key state-level inputs used for the modeled scenarios. Please see below for details.
Sectoral summaries	Description
Electricity summary	This section contains modeling assumptions for electricity sector state-level policies. Documented policies include renewable portfolio standards (RPS), coal retirement, and nuclear retention.
Transportation summary	This section contains modeling assumptions for transportation sector state-level policies. Documented policies include electric vehicle sales targets for light duty vehicles (LDVs) and freight trucks, and reductions in vehicle miles traveled (VMT).
Buildings summary	This section contains assumptions for buildings sector state-level policies. Documented policies include building energy efficiency standards and electrification targets for space and water heating.

## Sheet: Electricity summary
Electricity Sector Summary
Sheets in this section	Description	Notes
RPS	State-level assumptions for renewable electricity achieved in each model year through 2035.	For the Current Policies scenario, we base assumptions on Renewable Portfolio Standards (RPS) targets in 29 U.S. states and the District of Columbia. In states with non-binding renewable portfolio goals, the RPS target is assumed to be 0%. For the Enhanced Ambition scenario, states are categorized into three tiers, Tier 1 states achieve 75% renewable electricity generation by 2035;Tier 2 states a…
Coal_retirement	State-level assumptions for coal power generation for each model year through 2035.	For the Current Policies scenario, we collected announced retirement dates for all existing coal power plants in the United States and applied these to the historical electricity generation from each of these plants in 2020 to construct a future trajectory for electricity generation from all coal power plants. These plant-level trajectories were then aggregated to the state level to produce an up…
Nuclear	State-level assumptions for nuclear power generation for each model year through 2035.	For the Current Policies scenario, we assume that between 2020 and 2025, 26,670,299 MWh of generation are lost due to retired capacity in IA, MI, and NY, while all other at-risk capacity is saved by state and federal policy. In addition, Georgia Vogtle Units 3 & 4 come online. No changes to total capacity are assumed to occur between 2025 and 2030. Values in this tab are final inputs for modeling.

## Sheet: RPS
Scenario	Type	State	2020	2025	2030	2035
Current Policies	non-hydro	AK
Current Policies	non-hydro	AL
Current Policies	non-hydro	AR
Current Policies	non-hydro	AZ	0.06	0.09	0.09	0.09
Current Policies	non-hydro	CA	0.3	0.43	0.55	0.56
Current Policies	non-hydro	CO	0.19	0.19	0.19	0.19
Current Policies	non-hydro	CT	0.26	0.35	0.45	0.45
Current Policies	non-hydro	DC	0.2	0.52	0.87	1
Current Policies	non-hydro	DE	0.14	0.19	0.21	0.32
Current Policies	non-hydro	FL
Current Policies	non-hydro	GA
Current Policies	non-hydro	HI	0.28	0.4	0.48	0.64
Current Policies	non-hydro	IA
Current Policies	non-hydro	ID
Current Policies	non-hydro	IL	0.16	0.23	0.37	0.42
Current Policies	non-hydro	IN
Current Policies	non-hydro	KS
Current Policies	non-hydro	KY
Current Policies	non-hydro	LA
Current Policies	non-hydro	MA	0.17	0.27	0.39	0.43
Current Policies	non-hydro	MD	0.26	0.33	0.46	0.46
Current Policies	non-hydro	ME	0.23	0.39	0.61	0.62
Current Policies	non-hydro	MI	0.11	0.12	0.12	0.12
Current Policies	non-hydro	MN	0.32	0.34	0.5	0.76
Current Policies	non-hydro	MO	0.06	0.09	0.09	0.09
Current Policies	non-hydro	MS
Current Policies	non-hydro	MT
Current Policies	non-hydro	NC
Current Policies	non-hydro	ND
Current Policies	non-hydro	NE
Current Policies	non-hydro	NH	0.07	0.17	0.17	0.17
Current Policies	non-hydro	NJ	0.28	0.41	0.53	0.51
Current Policies	non-hydro	NM	0.16	0.36	0.45	0.58
Current Policies	non-hydro	NV	0.17	0.29	0.43	0.44
Current Policies	non-hydro	NY	0.34	0.51	0.7	0.7
Current Policies	non-hydro	OH
Current Policies	non-hydro	OK
Current Policies	non-hydro	OR	0.12	0.19	0.25	0.32
Current Policies	non-hydro	PA	0.12	0.14	0.14	0.14
Current Policies	non-hydro	RI	0.12	0.3	0.67	0.95
Current Policies	non-hydro	SC
Current Policies	non-hydro	SD
Current Policies	non-hydro	TN
Current Policies	non-hydro	TX
Current Policies	non-hydro	UT
Current Policies	non-hydro	VA	0	0.12	0.21	0.31
Current Policies	non-hydro	VT	0.25	0.3	0.39	0.44
Current Policies	non-hydro	WA	0.12	0.12	0.12	0.12
Current Policies	non-hydro	WI
Current Policies	non-hydro	WV
Current Policies	non-hydro	WY
Enhanced Ambition	non-hydro	AK	0	0	0	0
Enhanced Ambition	non-hydro	AL	0	0	0.07	0.14
Enhanced Ambition	non-hydro	AR	0	0	0.08	0.15
Enhanced Ambition	non-hydro	AZ	0.06	0.22	0.39	0.55
Enhanced Ambition	non-hydro	CA	0.3	0.44	0.59	0.73
Enhanced Ambition	non-hydro	CO	0.19	0.37	0.56	0.74
Enhanced Ambition	non-hydro	CT	0.26	0.42	0.57	0.73
Enhanced Ambition	non-hydro	DC	0.2	0.52	0.87	1
Enhanced Ambition	non-hydro	DE	0.14	0.34	0.55	0.75
Enhanced Ambition	non-hydro	FL	0	0.07	0.13	0.2
Enhanced Ambition	non-hydro	GA	0	0.04	0.11	0.18
Enhanced Ambition	non-hydro	HI	0.28	0.44	0.59	0.74
Enhanced Ambition	non-hydro	IA	0	0.16	0.35	0.53
Enhanced Ambition	non-hydro	ID	0	0	0	0
Enhanced Ambition	non-hydro	IL	0.16	0.35	0.55	0.74
Enhanced Ambition	non-hydro	IN	0	0.06	0.13	0.2
Enhanced Ambition	non-hydro	KS	0	0.07	0.13	0.2
Enhanced Ambition	non-hydro	KY	0	0.02	0.09	0.16
Enhanced Ambition	non-hydro	LA	0	0.05	0.12	0.19
Enhanced Ambition	non-hydro	MA	0.17	0.36	0.54	0.73
Enhanced Ambition	non-hydro	MD	0.26	0.41	0.56	0.72
Enhanced Ambition	non-hydro	ME	0.23	0.39	0.61	0.74
Enhanced Ambition	non-hydro	MI	0.11	0.25	0.4	0.54
Enhanced Ambition	non-hydro	MN	0.32	0.46	0.61	0.76
Enhanced Ambition	non-hydro	MO	0.06	0.22	0.38	0.55
Enhanced Ambition	non-hydro	MS	0	0.07	0.13	0.2
Enhanced Ambition	non-hydro	MT	0	0	0	0.01
Enhanced Ambition	non-hydro	NC	0	0.17	0.36	0.54
Enhanced Ambition	non-hydro	ND	0	0.01	0.09	0.16
Enhanced Ambition	non-hydro	NE	0	0.03	0.1	0.17
Enhanced Ambition	non-hydro	NH	0.07	0.28	0.48	0.69
Enhanced Ambition	non-hydro	NJ	0.28	0.44	0.59	0.75
Enhanced Ambition	non-hydro	NM	0.16	0.36	0.56	0.75
Enhanced Ambition	non-hydro	NV	0.17	0.3	0.44	0.57
Enhanced Ambition	non-hydro	NY	0.34	0.51	0.7	0.84
Enhanced Ambition	non-hydro	OH	0	0.19	0.38	0.56
Enhanced Ambition	non-hydro	OK	0	0.02	0.09	0.16
Enhanced Ambition	non-hydro	OR	0.12	0.33	0.53	0.74
Enhanced Ambition	non-hydro	PA	0.12	0.32	0.52	0.72
Enhanced Ambition	non-hydro	RI	0.12	0.31	0.67	0.96
Enhanced Ambition	non-hydro	SC	0	0.04	0.11	0.18
Enhanced Ambition	non-hydro	SD	0	0	0	0
Enhanced Ambition	non-hydro	TN	0	0	0.01	0.09
Enhanced Ambition	non-hydro	TX	0	0.09	0.16	0.23
Enhanced Ambition	non-hydro	UT	0	0.05	0.12	0.19
Enhanced Ambition	non-hydro	VA	0	0.21	0.39	0.58
Enhanced Ambition	non-hydro	VT	0.25	0.32	0.4	0.47
Enhanced Ambition	non-hydro	WA	0.12	0.33	0.54	0.74
Enhanced Ambition	non-hydro	WI	0	0.15	0.34	0.52
Enhanced Ambition	non-hydro	WV	0	0.06	0.12	0.19
Enhanced Ambition	non-hydro	WY	0	0.05	0.12	0.19

## Sheet: Coal_retirement
		Total electricity generation from coal from existing plants (TWh)
Scenario	State	2020	2025	2030	2035
Current Policies	AK	0.417157	0.177136	0.177136	0.177136
Current Policies	AL	21.5535	20.3496	16.228	16.228
Current Policies	AR	15.3883	15.3883	8.55198	8.55198
Current Policies	AZ	13.7473	10.6004	8.79316	4.40373
Current Policies	CA	0	0	0	0
Current Policies	CO	19.4784	15.0883	2.08562	0
Current Policies	CT	0	0	0	0
Current Policies	DE	0.102274	0.102274	0	0
Current Policies	FL	17.8117	10.8446	9.0683	5.8022
Current Policies	GA	13.7454	12.3391	7.1338	2.8126
Current Policies	HI	1.16515	0	0	0
Current Policies	IA	12.7857	11.1251	11.1251	11.1251
Current Policies	ID	0	0	0	0
Current Policies	IL	29.4738	15.35	11.5449	11.5449
Current Policies	IN	40.7545	28.5285	13.9645	9.26581
Current Policies	KS	16.9598	11.8712	7.44592	7.44592
Current Policies	KY	43.6383	40.7048	38.2644	34.6149
Current Policies	LA	3.73768	2.9481	0.90961	0.90961
Current Policies	MA	0	0	0	0
Current Policies	MD	2.40679	0	0	0
Current Policies	ME	0	0	0	0
Current Policies	MI	27.9594	16.7061	12.4946	12.4946
Current Policies	MN	13.9062	8.29296	2.53167	0
Current Policies	MO	51.191	44.4425	41.0874	41.0874
Current Policies	MS	4.59352	3.45708	2.32063	2.32063
Current Policies	MT	8.47901	0.320993	0.320993	0.320993
Current Policies	NC	20.5338	20.0014	12.1587	8.11632
Current Policies	ND	24.4004	23.8932	23.8932	23.8932
Current Policies	NE	18.483	16.7446	16.7446	16.7446
Current Policies	NH	0.128482	0.128482	0.128482	0.128482
Current Policies	NJ	0.441946	0	0	0
Current Policies	NM	12.7882	7.47396	7.47396	0
Current Policies	NV	1.9532	0	0	0
Current Policies	NY	0.143692	0	0	0
Current Policies	OH	45.0086	33.4898	23.8651	23.8651
Current Policies	OK	5.87085	4.7491	4.7491	4.7491
Current Policies	OR	1.63014	1.63014	1.63014	1.63014
Current Policies	PA	22.024	21.3143	6.20494	6.20494
Current Policies	RI	0	0	0	0
Current Policies	SC	12.268	11.1341	6.21063	6.21063
Current Policies	SD	1.64822	1.64822	1.64822	1.64822
Current Policies	TN	13.8392	7.96387	2.2806	0
Current Policies	TX	78.8253	72.255	60.7596	58.9796
Current Policies	UT	22.806	16.0632	12.8091	12.8091
Current Policies	VA	3.63881	0.706064	0.706064	0.706064
Current Policies	VT	0	0	0	0
Current Policies	WA	5.14322	0	0	0
Current Policies	WI	23.4853	13.2491	13.2491	13.2491
Current Policies	WV	50.2164	45.3438	45.3438	40.2847
Current Policies	WY	33.0594	25.353	21.0368	21.0368
Current Policies	DC	0	0	0	0

## Sheet: Nuclear
		Total electricity generation from nuclear (TWh)
Scenario	State	2020	2025	2030	2035
Current Policies	AK	0	0	0	0
Current Policies	AL	39.4722	39.4722	39.4722	39.4722
Current Policies	AR	12.7222	12.7222	12.7222	12.7222
Current Policies	AZ	31.1111	31.1111	31.1111	31.1111
Current Policies	CA	18.2222	18.2222	18.2222	18.2222
Current Policies	CO	0	0	0	0
Current Policies	CT	16.8889	16.8889	16.8889	16.8889
Current Policies	DE	0	0	0	0
Current Policies	FL	29.3056	29.3056	29.3056	29.3056
Current Policies	GA	34.3611	51.5556	51.5556	51.5556
Current Policies	HI	0	0	0	0
Current Policies	IA	4.88889	0	0	0
Current Policies	ID	0	0	0	0
Current Policies	IL	98.1111	98.1111	98.1111	98.1111
Current Policies	IN	0	0	0	0
Current Policies	KS	9.16667	9.16667	9.16667	9.16667
Current Policies	KY	0	0	0	0
Current Policies	LA	17.1389	17.1389	17.1389	17.1389
Current Policies	MA	0	0	0	0
Current Policies	MD	15	15	15	15
Current Policies	ME	0	0	0	0
Current Policies	MI	30.4722	25.0278	25.0278	25.0278
Current Policies	MN	14.6111	14.6111	14.6111	14.6111
Current Policies	MO	10.6667	10.6667	10.6667	10.6667
Current Policies	MS	6.91667	6.91667	6.91667	6.91667
Current Policies	MT	0	0	0	0
Current Policies	NC	42.0833	42.0833	42.0833	42.0833
Current Policies	ND	0	0	0	0
Current Policies	NE	5.63889	5.63889	5.63889	5.63889
Current Policies	NH	10.0556	10.0556	10.0556	10.0556
Current Policies	NJ	28.4444	28.4444	28.4444	28.4444
Current Policies	NM	0	0	0	0
Current Policies	NV	0	0	0	0
Current Policies	NY	42.9167	26.6111	26.6111	26.6111
Current Policies	OH	18.3056	18.3056	18.3056	18.3056
Current Policies	OK	0	0	0	0
Current Policies	OR	0	0	0	0
Current Policies	PA	76.1389	76.1389	76.1389	76.1389
Current Policies	RI	0	0	0	0
Current Policies	SC	52.7222	52.7222	52.7222	52.7222
Current Policies	SD	0	0	0	0
Current Policies	TN	36.1667	36.1667	36.1667	36.1667
Current Policies	TX	41.1944	41.1944	41.1944	41.1944
Current Policies	UT	0	0	0	0
Current Policies	VA	29.25	29.25	29.25	29.25
Current Policies	VT	0	0	0	0
Current Policies	WA	9.72222	9.72222	9.72222	9.72222
Current Policies	WI	10.1389	10.1389	10.1389	10.1389
Current Policies	WV	0	0	0	0
Current Policies	WY	0	0	0	0
Current Policies	DC	0	0	0	0

## Sheet: Transportation summary
Transportation Sector Summary
Sheets in this section	Description	Notes
LDV_EV_Sales	State-level assumptions for LDV EV sales achieved in each model year through 2035.	The Current Policies scenario includes ZEV sales targets associated with the states that have adopted or announced adoption of Advanced Clean Cars I and Advanced Clean Cars II legislation. The Enhanced Ambition scenario assumes that Tier 1 states adopt Advanced Clean Cars II beginning in 2025 and achieve the ZEV sales targets as written; Tier 2 states achieve the sales targets with a 3-year time …
Truck_EV_Sales	State-level assumptions for freight truck EV sales achieved in each model year through 2035.	The Current Policies scenario includes ZEV sales targets associated with the states that have adopted Advanced Clean Trucks legislation. The Enhanced Ambition scenario assumes that Tier 1 states based on model states with given Tiers and begin in 2025. Current Policies apply to the ZEV sales targets associated with the states that have adopted Advanced Clean Trucks legislation. Enhanced Ambition …
VMT	State-level assumptions for vehicle miles traveled reductions achieved in each model year through 2035.	We do not assume any vehicle miles traved (VMT) reductions under the Current Policies scenario. In the Enhanced Ambition scenario, VMT reduction policies are applied from 2026 through 2035. Tier 1, Tier 2 and Tier 3 states achieve a 1.25%, 1%, and 0.75%, annualized average VMT reduction rate, respectively. See Supplementary Information for more details. Values in this tab are final inputs for mod…

## Sheet: LDV_EV_Sales
Scenario	State	2025	2030	2035
Current Policies	AK	0	0	0
Current Policies	AL	0	0	0
Current Policies	AR	0	0	0
Current Policies	AZ	0	0	0
Current Policies	CA	0.22	0.68	1
Current Policies	CO	0.22	0	0
Current Policies	CT	0.22	0.68	1
Current Policies	DC	0	0	0
Current Policies	DE	0.22	0.68	1
Current Policies	FL	0	0	0
Current Policies	GA	0	0	0
Current Policies	HI	0	0	0
Current Policies	IA	0	0	0
Current Policies	ID	0	0	0
Current Policies	IL	0	0	0
Current Policies	IN	0	0	0
Current Policies	KS	0	0	0
Current Policies	KY	0	0	0
Current Policies	LA	0	0	0
Current Policies	MA	0.22	0.68	1
Current Policies	MD	0.22	0.68	1
Current Policies	ME	0	0	0
Current Policies	MI	0	0	0
Current Policies	MN	0.22	0	0
Current Policies	MO	0	0	0
Current Policies	MS	0	0	0
Current Policies	MT	0	0	0
Current Policies	NC	0	0	0
Current Policies	ND	0	0	0
Current Policies	NE	0	0	0
Current Policies	NH	0	0	0
Current Policies	NJ	0.22	0.68	1
Current Policies	NM	0.22	0	0
Current Policies	NV	0.22	0	0
Current Policies	NY	0.22	0.68	1
Current Policies	OH	0	0	0
Current Policies	OK	0	0	0
Current Policies	OR	0.22	0.68	1
Current Policies	PA	0	0	0
Current Policies	RI	0.22	0.68	1
Current Policies	SC	0	0	0
Current Policies	SD	0	0	0
Current Policies	TN	0	0	0
Current Policies	TX	0	0	0
Current Policies	UT	0	0	0
Current Policies	VA	0.22	0	0
Current Policies	VT	0.22	0.68	1
Current Policies	WA	0.22	0.68	1
Current Policies	WI	0	0	0
Current Policies	WV	0	0	0
Current Policies	WY	0	0	0
Enhanced Ambition	AK	0.07	0.195	0.59
Enhanced Ambition	AL	0.07	0.195	0.59
Enhanced Ambition	AR	0.07	0.195	0.59
Enhanced Ambition	AZ	0.145	0.43	0.82
Enhanced Ambition	CA	0.22	0.68	1
Enhanced Ambition	CO	0.22	0.68	1
Enhanced Ambition	CT	0.22	0.68	1
Enhanced Ambition	DC	0.22	0.68	1
Enhanced Ambition	DE	0.22	0.68	1
Enhanced Ambition	FL	0.07	0.195	0.59
Enhanced Ambition	GA	0.07	0.195	0.59
Enhanced Ambition	HI	0.22	0.68	1
Enhanced Ambition	IA	0.145	0.43	0.82
Enhanced Ambition	ID	0.07	0.195	0.59
Enhanced Ambition	IL	0.22	0.68	1
Enhanced Ambition	IN	0.07	0.195	0.59
Enhanced Ambition	KS	0.07	0.195	0.59
Enhanced Ambition	KY	0.07	0.195	0.59
Enhanced Ambition	LA	0.07	0.195	0.59
Enhanced Ambition	MA	0.22	0.68	1
Enhanced Ambition	MD	0.22	0.68	1
Enhanced Ambition	ME	0.22	0.68	1
Enhanced Ambition	MI	0.145	0.43	0.82
Enhanced Ambition	MN	0.22	0.68	1
Enhanced Ambition	MO	0.145	0.43	0.82
Enhanced Ambition	MS	0.07	0.195	0.59
Enhanced Ambition	MT	0.07	0.195	0.59
Enhanced Ambition	NC	0.145	0.43	0.82
Enhanced Ambition	ND	0.07	0.195	0.59
Enhanced Ambition	NE	0.07	0.195	0.59
Enhanced Ambition	NH	0.22	0.68	1
Enhanced Ambition	NJ	0.22	0.68	1
Enhanced Ambition	NM	0.22	0.68	1
Enhanced Ambition	NV	0.145	0.43	0.82
Enhanced Ambition	NY	0.22	0.68	1
Enhanced Ambition	OH	0.145	0.43	0.82
Enhanced Ambition	OK	0.07	0.195	0.59
Enhanced Ambition	OR	0.22	0.68	1
Enhanced Ambition	PA	0.22	0.68	1
Enhanced Ambition	RI	0.22	0.68	1
Enhanced Ambition	SC	0.07	0.195	0.59
Enhanced Ambition	SD	0.07	0.195	0.59
Enhanced Ambition	TN	0.07	0.195	0.59
Enhanced Ambition	TX	0.07	0.195	0.59
Enhanced Ambition	UT	0.07	0.195	0.59
Enhanced Ambition	VA	0.145	0.43	0.82
Enhanced Ambition	VT	0.22	0.68	1
Enhanced Ambition	WA	0.22	0.68	1
Enhanced Ambition	WI	0.145	0.43	0.82
Enhanced Ambition	WV	0.07	0.195	0.59
Enhanced Ambition	WY	0.07	0.195	0.59

## Sheet: Truck_EV_Sales
Scenario	State	Type (Light, Med, Heavy)	2025	2030	2035
Current Policies	AK	Light	0	0	0
Current Policies	AL	Light	0	0	0
Current Policies	AR	Light	0	0	0
Current Policies	AZ	Light	0	0	0
Current Policies	CA	Light	0.07	0.3	0.55
Current Policies	CO	Light	0.07	0.3	0.55
Current Policies	CT	Light	0.07	0.3	0.55
Current Policies	DC	Light	0	0	0
Current Policies	DE	Light	0	0	0
Current Policies	FL	Light	0	0	0
Current Policies	GA	Light	0	0	0
Current Policies
Current Policies	HI	Light	0	0	0
Current Policies	IA	Light	0	0	0
Current Policies	IL	Light	0	0	0
Current Policies	IN	Light	0	0	0
Current Policies	KS	Light	0	0	0
Current Policies	KY	Light	0	0	0
Current Policies	LA	Light	0	0	0
Current Policies	MA	Light	0.07	0.3	0.55
Current Policies	MD	Light	0.07	0.3	0.55
Current Policies	ME	Light	0	0	0
Current Policies	MI	Light	0	0	0
Current Policies	MN	Light	0	0	0
Current Policies	MO	Light	0	0	0
Current Policies	MS	Light	0	0	0
Current Policies	MT	Light	0	0	0
Current Policies	NC	Light	0.07	0.3	0.55
Current Policies	ND	Light	0	0	0
Current Policies	NE	Light	0	0	0
Current Policies	NH	Light	0	0	0
Current Policies	NJ	Light	0.07	0.3	0.55
Current Policies	NM	Light	0.07	0.3	0.55
Current Policies	NV	Light	0	0	0
Current Policies	NY	Light	0.07	0.3	0.55
Current Policies	OH	Light	0	0	0
Current Policies	OK	Light	0	0	0
Current Policies	OR	Light	0.07	0.3	0.55
Current Policies	PA	Light	0	0	0
Current Policies	RI	Light	0.07	0.3	0.55
Current Policies	SC	Light	0	0	0
Current Policies	SD	Light	0	0	0
Current Policies	TN	Light	0	0	0
Current Policies	TX	Light	0	0	0
Current Policies	UT	Light	0	0	0
Current Policies	VA	Light	0	0	0
Current Policies	VT	Light	0.07	0.3	0.55
Current Policies	WA	Light	0.07	0.3	0.55
Current Policies	WI	Light	0	0	0
Current Policies	WV	Light	0	0	0
Current Policies	WY	Light	0	0	0
Current Policies	AK	Medium	0	0	0
Current Policies	AL	Medium	0	0	0
Current Policies	AR	Medium	0	0	0
Current Policies	AZ	Medium	0	0	0
Current Policies	CA	Medium	0.11	0.5	0.75
Current Policies	CO	Medium	0.11	0.5	0.75
Current Policies	CT	Medium	0.11	0.5	0.75
Current Policies	DC	Medium	0	0	0
Current Policies	DE	Medium	0	0	0
Current Policies	FL	Medium	0	0	0
Current Policies	GA	Medium	0	0	0
Current Policies	HI	Medium	0	0	0
Current Policies	IA	Medium	0	0	0
Current Policies	ID	Medium	0	0	0
Current Policies	IL	Medium	0	0	0
Current Policies	IN	Medium	0	0	0
Current Policies	KS	Medium	0	0	0
Current Policies	KY	Medium	0	0	0
Current Policies	LA	Medium	0	0	0
Current Policies	MA	Medium	0.11	0.5	0.75
Current Policies	MD	Medium	0.11	0.5	0.75
Current Policies	ME	Medium	0	0	0
Current Policies	MI	Medium	0	0	0
Current Policies	MN	Medium	0	0	0
Current Policies	MO	Medium	0	0	0
Current Policies	MS	Medium	0	0	0
Current Policies	MT	Medium	0	0	0
Current Policies	NC	Medium	0.11	0.5	0.75
Current Policies	ND	Medium	0	0	0
Current Policies	NE	Medium	0	0	0
Current Policies	NH	Medium	0	0	0
Current Policies	NJ	Medium	0.11	0.5	0.75
Current Policies	NM	Medium	0.11	0.5	0.75
Current Policies	NV	Medium	0	0	0
Current Policies	NY	Medium	0.11	0.5	0.75
Current Policies	OH	Medium	0	0	0
Current Policies	OK	Medium	0	0	0
Current Policies	OR	Medium	0.11	0.5	0.75
Current Policies	PA	Medium	0	0	0
Current Policies	RI	Medium	0.11	0.5	0.75
Current Policies	SC	Medium	0	0	0
Current Policies	SD	Medium	0	0	0
Current Policies	TN	Medium	0	0	0
Current Policies	TX	Medium	0	0	0
Current Policies	UT	Medium	0	0	0
Current Policies	VA	Medium	0	0	0
Current Policies	VT	Medium	0.11	0.5	0.75
Current Policies	WA	Medium	0.11	0.5	0.75
Current Policies	WI	Medium	0	0	0
Current Policies	WV	Medium	0	0	0
Current Policies	WY	Medium	0	0	0
Current Policies	AK	Heavy	0	0	0
Current Policies	AL	Heavy	0	0	0
Current Policies	AR	Heavy	0	0	0
Current Policies	AZ	Heavy	0	0	0
Current Policies	CA	Heavy	0.07	0.3	0.4
Current Policies	CO	Heavy	0.07	0.3	0.4
Current Policies	CT	Heavy	0.07	0.3	0.4
Current Policies	DC	Heavy	0	0	0
Current Policies	DE	Heavy	0	0	0
Current Policies	FL	Heavy	0	0	0
Current Policies	GA	Heavy	0	0	0
Current Policies	HI	Heavy	0	0	0
Current Policies	IA	Heavy	0	0	0
Current Policies	ID	Heavy	0	0	0
Current Policies	IL	Heavy	0	0	0
Current Policies	IN	Heavy	0	0	0
Current Policies	KS	Heavy	0	0	0
Current Policies	KY	Heavy	0	0	0
Current Policies	LA	Heavy	0	0	0
Current Policies	MA	Heavy	0.07	0.3	0.4
Current Policies	MD	Heavy	0.07	0.3	0.4
Current Policies	ME	Heavy	0	0	0
Current Policies	MI	Heavy	0	0	0
Current Policies	MN	Heavy	0	0	0
Current Policies	MO	Heavy	0	0	0
Current Policies	MS	Heavy	0	0	0
Current Policies	MT	Heavy	0	0	0
Current Policies	NC	Heavy	0.07	0.3	0.4
Current Policies	ND	Heavy	0	0	0
Current Policies	NE	Heavy	0	0	0
Current Policies	NH	Heavy	0	0	0
Current Policies	NJ	Heavy	0.07	0.3	0.4
Current Policies	NM	Heavy	0.07	0.3	0.4
Current Policies	NV	Heavy	0	0	0
Current Policies	NY	Heavy	0.07	0.3	0.4
Current Policies	OH	Heavy	0	0	0
Current Policies	OK	Heavy	0	0	0
Current Policies	OR	Heavy	0.07	0.3	0.4
Current Policies	PA	Heavy	0	0	0
Current Policies	RI	Heavy	0.07	0.3	0.4
Current Policies	SC	Heavy	0	0	0
Current Policies	SD	Heavy	0	0	0
Current Policies	TN	Heavy	0	0	0
Current Policies	TX	Heavy	0	0	0
Current Policies	UT	Heavy	0	0	0
Current Policies	VA	Heavy	0	0	0
Current Policies	VT	Heavy	0.07	0.3	0.4
Current Policies	WA	Heavy	0.07	0.3	0.4
Current Policies	WI	Heavy	0	0	0
Current Policies	WV	Heavy	0	0	0
Current Policies	WY	Heavy	0	0	0
Enhanced Ambition	AK	Light	0	0.05	0.25
Enhanced Ambition	AL	Light	0	0.05	0.25
Enhanced Ambition	AR	Light	0	0.05	0.25
Enhanced Ambition	AZ	Light	0	0.15	0.4
Enhanced Ambition	CA	Light	0.07	0.3	0.55
Enhanced Ambition	CO	Light	0.07	0.3	0.55
Enhanced Ambition	CT	Light	0.07	0.3	0.55
Enhanced Ambition	DC	Light	0.07	0.3	0.55
Enhanced Ambition	DE	Light	0.07	0.3	0.55
Enhanced Ambition	FL	Light	0	0.05	0.25
Enhanced Ambition	GA	Light	0	0.05	0.25
Enhanced Ambition	HI	Light	0.07	0.3	0.55
Enhanced Ambition	IA	Light	0	0.15	0.4
Enhanced Ambition	ID	Light	0	0.05	0.25
Enhanced Ambition	IL	Light	0.07	0.3	0.55
Enhanced Ambition	IN	Light	0	0.05	0.25
Enhanced Ambition	KS	Light	0	0.05	0.25
Enhanced Ambition	KY	Light	0	0.05	0.25
Enhanced Ambition	LA	Light	0	0.05	0.25
Enhanced Ambition	MA	Light	0.07	0.3	0.55
Enhanced Ambition	MD	Light	0.07	0.3	0.55
Enhanced Ambition	ME	Light	0.07	0.3	0.55
Enhanced Ambition	MI	Light	0	0.15	0.4
Enhanced Ambition	MN	Light	0.07	0.3	0.55
Enhanced Ambition	MO	Light	0	0.15	0.4
Enhanced Ambition	MS	Light	0	0.05	0.25
Enhanced Ambition	MT	Light	0	0.05	0.25
Enhanced Ambition	NC	Light	0	0.15	0.4
Enhanced Ambition	ND	Light	0	0.05	0.25
Enhanced Ambition	NE	Light	0	0.05	0.25
Enhanced Ambition	NH	Light	0.07	0.3	0.55
Enhanced Ambition	NJ	Light	0.07	0.3	0.55
Enhanced Ambition	NM	Light	0.07	0.3	0.55
Enhanced Ambition	NV	Light	0	0.15	0.4
Enhanced Ambition	NY	Light	0.07	0.3	0.55
Enhanced Ambition	OH	Light	0	0.15	0.4
Enhanced Ambition	OK	Light	0	0.05	0.25
Enhanced Ambition	OR	Light	0.07	0.3	0.55
Enhanced Ambition	PA	Light	0.07	0.3	0.55
Enhanced Ambition	RI	Light	0.07	0.3	0.55
Enhanced Ambition	SC	Light	0	0.05	0.25
Enhanced Ambition	SD	Light	0	0.05	0.25
Enhanced Ambition	TN	Light	0	0.05	0.25
Enhanced Ambition	TX	Light	0	0.05	0.25
Enhanced Ambition	UT	Light	0	0.05	0.25
Enhanced Ambition	VA	Light	0	0.15	0.4
Enhanced Ambition	VT	Light	0.07	0.3	0.55
Enhanced Ambition	WA	Light	0.07	0.3	0.55
Enhanced Ambition	WI	Light	0	0.15	0.4
Enhanced Ambition	WV	Light	0	0.05	0.25
Enhanced Ambition	WY	Light	0	0.05	0.25
Enhanced Ambition	AK	Medium	0	0.09	0.4
Enhanced Ambition	AL	Medium	0	0.09	0.4
Enhanced Ambition	AR	Medium	0	0.09	0.4
Enhanced Ambition	AZ	Medium	0	0.2	0.6
Enhanced Ambition	CA	Medium	0.11	0.5	0.75
Enhanced Ambition	CO	Medium	0.11	0.5	0.75
Enhanced Ambition	CT	Medium	0.11	0.5	0.75
Enhanced Ambition	DC	Medium	0.11	0.5	0.75
Enhanced Ambition	DE	Medium	0.11	0.5	0.75
Enhanced Ambition	FL	Medium	0	0.09	0.4
Enhanced Ambition	GA	Medium	0	0.09	0.4
Enhanced Ambition	HI	Medium	0.11	0.5	0.75
Enhanced Ambition	IA	Medium	0	0.2	0.6
Enhanced Ambition	ID	Medium	0	0.09	0.4
Enhanced Ambition	IL	Medium	0.11	0.5	0.75
Enhanced Ambition	IN	Medium	0	0.09	0.4
Enhanced Ambition	KS	Medium	0	0.09	0.4
Enhanced Ambition	KY	Medium	0	0.09	0.4
Enhanced Ambition	LA	Medium	0	0.09	0.4
Enhanced Ambition	MA	Medium	0.11	0.5	0.75
Enhanced Ambition	MD	Medium	0.11	0.5	0.75
Enhanced Ambition	ME	Medium	0.11	0.5	0.75
Enhanced Ambition	MI	Medium	0	0.2	0.6
Enhanced Ambition	MN	Medium	0.11	0.5	0.75
Enhanced Ambition	MO	Medium	0	0.2	0.6
Enhanced Ambition	MS	Medium	0	0.09	0.4
Enhanced Ambition	MT	Medium	0	0.09	0.4
Enhanced Ambition	NC	Medium	0	0.2	0.6
Enhanced Ambition	ND	Medium	0	0.09	0.4
Enhanced Ambition	NE	Medium	0	0.09	0.4
Enhanced Ambition	NH	Medium	0.11	0.5	0.75
Enhanced Ambition	NJ	Medium	0.11	0.5	0.75
Enhanced Ambition	NM	Medium	0.11	0.5	0.75
Enhanced Ambition	NV	Medium	0	0.2	0.6
Enhanced Ambition	NY	Medium	0.11	0.5	0.75
Enhanced Ambition	OH	Medium	0	0.2	0.6
Enhanced Ambition	OK	Medium	0	0.09	0.4
Enhanced Ambition	OR	Medium	0.11	0.5	0.75
Enhanced Ambition	PA	Medium	0.11	0.5	0.75
Enhanced Ambition	RI	Medium	0.11	0.5	0.75
Enhanced Ambition	SC	Medium	0	0.09	0.4
Enhanced Ambition	SD	Medium	0	0.09	0.4
Enhanced Ambition	TN	Medium	0	0.09	0.4
Enhanced Ambition	TX	Medium	0	0.09	0.4
Enhanced Ambition	UT	Medium	0	0.09	0.4
Enhanced Ambition	VA	Medium	0	0.2	0.6
Enhanced Ambition	VT	Medium	0.11	0.5	0.75
Enhanced Ambition	WA	Medium	0.11	0.5	0.75
Enhanced Ambition	WI	Medium	0	0.2	0.6
Enhanced Ambition	WV	Medium	0	0.09	0.4
Enhanced Ambition	WY	Medium	0	0.09	0.4
Enhanced Ambition	AK	Heavy	0	0.05	0.25
Enhanced Ambition	AL	Heavy	0	0.05	0.25
Enhanced Ambition	AR	Heavy	0	0.05	0.25
Enhanced Ambition	AZ	Heavy	0	0.15	0.4
Enhanced Ambition	CA	Heavy	0.07	0.3	0.4
Enhanced Ambition	CO	Heavy	0.07	0.3	0.4
Enhanced Ambition	CT	Heavy	0.07	0.3	0.4
Enhanced Ambition	DC	Heavy	0.07	0.3	0.4
Enhanced Ambition	DE	Heavy	0.07	0.3	0.4
Enhanced Ambition	FL	Heavy	0	0.05	0.25
Enhanced Ambition	GA	Heavy	0	0.05	0.25
Enhanced Ambition	HI	Heavy	0.07	0.3	0.4
Enhanced Ambition	IA	Heavy	0	0.15	0.4
Enhanced Ambition	ID	Heavy	0	0.05	0.25
Enhanced Ambition	IL	Heavy	0.07	0.3	0.4
Enhanced Ambition	IN	Heavy	0	0.05	0.25
Enhanced Ambition	KS	Heavy	0	0.05	0.25
Enhanced Ambition	KY	Heavy	0	0.05	0.25
Enhanced Ambition	LA	Heavy	0	0.05	0.25
Enhanced Ambition	MA	Heavy	0.07	0.3	0.4
Enhanced Ambition	MD	Heavy	0.07	0.3	0.4
Enhanced Ambition	ME	Heavy	0.07	0.3	0.4
Enhanced Ambition	MI	Heavy	0	0.15	0.4
Enhanced Ambition	MN	Heavy	0.07	0.3	0.4
Enhanced Ambition	MO	Heavy	0	0.15	0.4
Enhanced Ambition	MS	Heavy	0	0.05	0.25
Enhanced Ambition	MT	Heavy	0	0.05	0.25
Enhanced Ambition	NC	Heavy	0	0.15	0.4
Enhanced Ambition	ND	Heavy	0	0.05	0.25
Enhanced Ambition	NE	Heavy	0	0.05	0.25
Enhanced Ambition	NH	Heavy	0.07	0.3	0.4
Enhanced Ambition	NJ	Heavy	0.07	0.3	0.4
Enhanced Ambition	NM	Heavy	0.07	0.3	0.4
Enhanced Ambition	NV	Heavy	0	0.15	0.4
Enhanced Ambition	NY	Heavy	0.07	0.3	0.4
Enhanced Ambition	OH	Heavy	0	0.15	0.4
Enhanced Ambition	OK	Heavy	0	0.05	0.25
Enhanced Ambition	OR	Heavy	0.07	0.3	0.4
Enhanced Ambition	PA	Heavy	0.07	0.3	0.4
Enhanced Ambition	RI	Heavy	0.07	0.3	0.4
Enhanced Ambition	SC	Heavy	0	0.05	0.25
Enhanced Ambition	SD	Heavy	0	0.05	0.25
Enhanced Ambition	TN	Heavy	0	0.05	0.25
Enhanced Ambition	TX	Heavy	0	0.05	0.25
Enhanced Ambition	UT	Heavy	0	0.05	0.25
Enhanced Ambition	VA	Heavy	0	0.15	0.4
Enhanced Ambition	VT	Heavy	0.07	0.3	0.4
Enhanced Ambition	WA	Heavy	0.07	0.3	0.4
Enhanced Ambition	WI	Heavy	0	0.15	0.4
Enhanced Ambition	WV	Heavy	0	0.05	0.25
Enhanced Ambition	WY	Heavy	0	0.05	0.25

## Sheet: ZEV_data
Current Policies
LDV								Trucks
								California
								Maryland
								Massachusets
								New Jersey
								New Mexico
								New York
								North Carolina
								Rhode Island
								Vermont
								Colorado
								Oregon
								Washington
								Conneticut
All In										Trucks
LDV

## Sheet: VMT
Scenario	State	2025	2030	2035
Enhanced Ambition	AK	0	0.0075	0.0075
Enhanced Ambition	AL	0	0.0075	0.0075
Enhanced Ambition	AR	0	0.0075	0.0075
Enhanced Ambition	AZ	0	0.01	0.01
Enhanced Ambition	CA	0	0.0125	0.0125
Enhanced Ambition	CO	0	0.0125	0.0125
Enhanced Ambition	CT	0	0.0125	0.0125
Enhanced Ambition	DC	0	0.0125	0.0125
Enhanced Ambition	DE	0	0.0125	0.0125
Enhanced Ambition	FL	0	0.0075	0.0075
Enhanced Ambition	GA	0	0.0075	0.0075
Enhanced Ambition	HI	0	0.0125	0.0125
Enhanced Ambition	IA	0	0.01	0.01
Enhanced Ambition	ID	0	0.0075	0.0075
Enhanced Ambition	IL	0	0.0125	0.0125
Enhanced Ambition	IN	0	0.0075	0.0075
Enhanced Ambition	KS	0	0.0075	0.0075
Enhanced Ambition	KY	0	0.0075	0.0075
Enhanced Ambition	LA	0	0.01	0.01
Enhanced Ambition	MA	0	0.0125	0.0125
Enhanced Ambition	MD	0	0.0125	0.0125
Enhanced Ambition	ME	0	0.0125	0.0125
Enhanced Ambition	MI	0	0.01	0.01
Enhanced Ambition	MN	0	0.0125	0.0125
Enhanced Ambition	MO	0	0.0075	0.0075
Enhanced Ambition	MS	0	0.0075	0.0075
Enhanced Ambition	MT	0	0.01	0.01
Enhanced Ambition	NC	0	0.01	0.01
Enhanced Ambition	ND	0	0.0075	0.0075
Enhanced Ambition	NE	0	0.0075	0.0075
Enhanced Ambition	NH	0	0.0125	0.0125
Enhanced Ambition	NJ	0	0.0125	0.0125
Enhanced Ambition	NM	0	0.0125	0.0125
Enhanced Ambition	NV	0	0.0125	0.0125
Enhanced Ambition	NY	0	0.0125	0.0125
Enhanced Ambition	OH	0	0.01	0.01
Enhanced Ambition	OK	0	0.0075	0.0075
Enhanced Ambition	OR	0	0.0125	0.0125
Enhanced Ambition	PA	0	0.0125	0.0125
Enhanced Ambition	RI	0	0.0125	0.0125
Enhanced Ambition	SC	0	0.0075	0.0075
Enhanced Ambition	SD	0	0.0075	0.0075
Enhanced Ambition	TN	0	0.0075	0.0075
Enhanced Ambition	TX	0	0.0075	0.0075
Enhanced Ambition	UT	0	0.0075	0.0075
Enhanced Ambition	VA	0	0.01	0.01
Enhanced Ambition	VT	0	0.0125	0.0125
Enhanced Ambition	WA	0	0.0125	0.0125
Enhanced Ambition	WI	0	0.01	0.01
Enhanced Ambition	WV	0	0.0075	0.0075
Enhanced Ambition	WY	0	0.0075	0.0075

[truncated: 4 more sheets: Buildings summary, Buildings_EERS_raw, Buildings_EERS_embeddedEE, Buildings_electrification]
